# Supplementary material
Source: PubMed Central journal article supplement (PMC5476296)
Supplement: NIHMS864281-supplement-Supplymentary_text___tables.pdf [file NIHMS864281-supplement-Supplymentary_text___tables.pdf]

1 **Lowering relative humidity level increases epidermal protein deimination**  
2 **and drives human filaggrin breakdown**

3  
4 Laura Cau, Valérie Pendaries, Emeline Lhuillier, Paul R Thompson, Guy Serre, Hidenari  
5 Takahara, Marie-Claire Méchin and Michel Simon  
6  
7

8 **S1. Supplementary materials and methods**

9  
10 *S1.1. Targeted DNA sequencing*

11 Genomic DNA was isolated from keratinocytes corresponding to the four different donors  
12 using the GenElute Mammalian Genomic DNA Miniprep kit (Sigma-Aldrich, St Louis, MO).  
13 DNA quality and quantity were assessed with a Nanodrop ND-1000 spectrophotometer, and a  
14 Qubit v3 fluorometer (Thermo Fisher Scientific, Waltham, MA) and the Qbit dsDNA HS  
15 Assay kit (Invitrogen Life Technologies, Carlsbad, CA). Mutation screening was performed  
16 by next generation sequencing using the Personal Genome Machine (PGM, Ion Torrent,  
17 Thermo Fisher Scientific) and the AmpliSeq technology (Ion Torrent). Using the AmpliSeq  
18 Designer tool ([ampliseq.com](http://ampliseq.com); v4.2), an AmpliSeq Custom Panel was designed to cover a  
19 panel of genes, comprising exonic regions and exon-intron boundaries. In particular, 97% of  
20 *FLG* was covered. Library construction and sequencing were performed at the GeT-Purpan  
21 core facility (Genome and Transcriptome, GenoToul, France). Briefly, libraries were  
22 produced using 10 ng of genomic DNA for each sample and each pool of AmpliSeq primers,  
23 with the Ion AmpliSeq library kit v2.0 (Ion Torrent) and Ion Xpress Barcodes, following the  
24 guidelines of the supplier. Final libraries were individually controlled and quantified on High  
25 Sensitivity DNA chips of a BioAnalyzer (Agilent Technologies, Waldbronn, Germany).

26 Libraries were then pooled, templated on Ion Sphere Particles using the One Touch 2  
27 instrument with HiQ kit, and finally sequenced on the Ion Torrent PGM using the sequencing  
28 HiQ chemistry, 400 bases run workflow, on a 316 v2 Ion chip. Data produced were processed  
29 using the Ion Torrent Suite Software tools (Thermo Fisher Scientific) for quality filtering,  
30 trimming, demultiplexing, aligning on the AmpliSeq hg19 reference human genome, and  
31 variant calling. A mean of 115804 usable reads was produced per donor DNA and the mean  
32 coverage per *FLG* base was 595. Variant caller files were then transferred to the Ion Reporter  
33 Software (v5.0, <http://ionreporter.lifetechnologies.com/>, Thermo Fisher Scientific) for  
34 filtering and annotation of detected variants. Mutations with an allele ratio lower than 0.1  
35 were filtered out.

36

### 37 *SI.2. Cell viability assay*

38 Cell viability of RHEs produced with keratinocytes from 3 different donors (3  
39 RHEs/condition/donor) was determined using an MTT (3-(4,5-dimethylthiazol-2-yl)-2,5-  
40 diphenyl tetrazolium bromide; Sigma-Aldrich) reduction assay as described previously  
41 [R1,R2]. RHEs topically treated with 3% SDS were used as a control. Optical density was  
42 measured at 550 nm.

43

### 44 *SI.3. Analysis of Lucifer Yellow permeability*

45 To test the epidermis outside-in permeability, 500  $\mu$ L of 1 mM lucifer yellow (Sigma-  
46 Aldrich) was added to RHEs (3 RHEs/condition/donor; 3 different donors). After incubation  
47 at 37°C and 5% CO<sub>2</sub> for 6 hours, the culture medium dye concentration was measured using a  
48 Varioskan Flash spectrophotometer (Thermo Fisher Scientific;  $\lambda_{\text{excitation}} = 425 \text{ nm}$  /  $\lambda_{\text{emission}} =$   
49 550 nm). An immature RHE (harvested at day 2) was used as positive control.

50

51

52 *S1.4. Transepidermal water loss measurement*

53 Transepidermal water loss (TEWL) of RHEs produced with keratinocytes from 3 different  
54 donors (3 RHEs/condition/donor) was measured using the tewameter TM300 (Courage &  
55 Khazaka, Cologne, Germany). Measurements were performed at stable temperature  
56 ( $20.5\pm 0.1^{\circ}\text{C}$ ) and relative humidity ( $48.0\pm 0.2\%$ ) according to the manufacturer's instructions.  
57 Before measurements, plate covers and sealing films were removed, and culture plates  
58 containing RHEs were maintained in the room for at least 20 min to allow equilibration with  
59 ambient conditions. Just prior to TEWL measurement, culture inserts were placed on a drop  
60 of medium into a Petri dish and a rubber seal was placed between the culture insert and the  
61 probe to ensure airtightness. For each RHE, 100 measurements were collected (1  
62 measurement/second) and mean  $\pm$  standard deviation was evaluated.

63

64 *S1.5. Western-blotting*

65 Either equal amounts of proteins (according to Ponceau staining) or equal volumes (for  
66 deiminated filaggrin-enriched extracts) were resolved by SDS-polyacrylamide gel  
67 electrophoresis and electrotransferred onto nitrocellulose membranes (GE Healthcare,  
68 Danderyd, SE). Membranes were blocked in a Tris-HCl buffer containing 5% skimmed milk  
69 and 0.05% Tween-20, then incubated overnight at  $4^{\circ}\text{C}$  with primary antibodies (for details,  
70 see Table S1) and finally incubated for 2 hours at room temperature with secondary  
71 horseradish peroxidase-conjugated antibodies diluted to 1:10000 (Goat Anti-Rabbit IgG-HRP  
72 and Swine-Anti-Goat IgG-HRP; SouthernBiotech, Birmingham, AL; Goat Anti-Mouse IgG-  
73 HRP; Bethyl Laboratories, Montgomery, TX). The detection was realized with ECL Prime  
74 system (GE Healthcare) and images were acquired with a G:BOX Chemi XT4 CCD camera  
75 (Syngene, Cambridge, United Kingdom) and GeneSys software (Genesys, Daly City, CA).

76 ImageJ software was used to quantify immunoreactive bands. Signals were normalized to  
77 actin immunodetection. Quantification was performed for extracts of RHEs produced with  
78 keratinocytes from 3 or 4 different donors and results are illustrated for 3 donors.

79

#### 80 *SI.6. Light microscopy and indirect immunofluorescence*

81 RHEs (1 RHE/condition/donors; 3 different donors) were fixed in 4% formaldehyde buffer  
82 (Sigma-Aldrich) for 24 hours at 4°C, and paraffin-embedded. For light microscopy analyses,  
83 five-micron sections were stained with hematoxylin-eosin. For indirect immunofluorescence  
84 analyses, after deparaffinization, rehydration and incubation in a blocking solution (2%  
85 bovine serum albumin and 0.05% Tween-20 in PBS), sections were first incubated with  
86 primary antibodies (for details, see Table S1) and then with the appropriate Alexa-fluor  
87 conjugated secondary antibodies (Invitrogen Life Technologies,) diluted to 1:1000 and 4'-6-  
88 diamidino-2-phenylindole (DAPI) diluted at 1 µg/ml. Slides were mounted in Mowiol 4-88  
89 (Calbiochem, San Diego, CA). Images were captured with a Nikon Eclipse 80i microscope  
90 (Nikon, Tokyo, Japan), with a Zeiss Apotome microscope (Carl Zeiss, Jena, Germany) or  
91 with a confocal SP8 microscope (Leica Microsystems, Nanterre, France). Ki67 positive  
92 nucleus counting was performed with ImageJ software on 20x enlargement pictures  
93 corresponding to 3 independent areas of each epidermis. The same brightness threshold was  
94 set for all pictures and positive nuclei were counted using the “Analyses Particles” tool. For  
95 quantification of deiminated proteins detected with the AMC antibody, images corresponding  
96 to 3 independent areas of each RHE were acquired using a confocal SP8 microscope with a  
97 63x oil immersion objective. The area and mean gray value of fluorescence was measured on  
98 each pictured with ImageJ software using a fixed threshold and amount of deiminated proteins  
99 were evaluated as [Area of fluorescence x Mean gray value of fluorescence]. For the visual

100 representation, the intensity of the fluorescence signal was coded as a color gradient with a  
101 16-color lookup table using ImageJ software, as previously described [R3].

102

### 103 *SI.7. In situ transglutaminase activity assay*

104 *In situ* transglutaminase assay was performed on cryosections of RHEs produced with  
105 keratinocytes from 3 different donors (1 RHE/condition/donor) as described previously  
106 [R4,R5]. Briefly, five-micron cryosections were blocked with 1% BSA in 0.1 M Tris-HCl pH  
107 8.4 for 30 min and then incubated for 2 hours at room temperature with Alexa-Fluor-555–  
108 cadaverine (Invitrogen Life Technologies) in 0.1 M Tris-HCl pH 8.4 and either 5 mM CaCl<sub>2</sub>  
109 or 5 mM EDTA (negative control). The reaction was stopped by incubating the sections with  
110 25 mM EDTA in PBS for 5 min. Nuclei were stained with DAPI diluted at 1 µg/ml in PBS  
111 and slides were mounted in Mowiol 4-88. For each RHE, 3 pictures corresponding to 3  
112 independent areas were acquired with a 63x oil immersion objective using a confocal SP8  
113 microscope (Leica Microsystems) and the area of fluorescence of each image was measured  
114 with ImageJ software using a fixed threshold and mean ± standard deviation was calculated.

115

### 116 *SI.8. In vitro calpain activity assay*

117 Calpain activity of RHE extracts (3 RHEs/condition/donor; 3 different donors) was  
118 evaluated using a fluorometric calpain activity assay kit (Abcam, Cambridge, United  
119 Kingdom) according to the manufacturer's instructions. Briefly, RHEs were homogenized on  
120 ice in the extraction buffer provided, which specifically extracts cytosolic proteins. After  
121 centrifugation (15000g, 10 min, 4°C), RHE extracts were incubated in the reaction buffer with  
122 a calpain substrate (Ac-LLY-AFC) for 1 hour at 37°C in darkness. For each sample, controls  
123 were performed in the presence of 2.5 mM of the calpain inhibitor N-Acetyl-Leu-Leu-Nle-  
124 CHO (Sigma-Aldrich) to assess the specificity of calpain-independent release of fluorescence.

125 Upon cleavage of the substrate by calpain, free AFC emits a yellow-green fluorescence that  
126 was quantified using a Varioskan Flash spectrophotometer (Thermo Fisher Scientific;  $\lambda_{\text{excitation}}$   
127 = 400 nm/  $\lambda_{\text{emission}}$  = 505 nm). The fluorescence intensity of controls was subtracted from the  
128 total fluorescence intensity of the sample to determine calpain activity specific fluorescence.  
129 Results are expressed as relative fluorescence units.

130

### 131 *SI.9. Reverse transcription*

132 RHEs (1 RHE/condition/donor; 4 different donors) were placed in RNAlater RNA  
133 stabilization solution (Qiagen, Hilden, Germany) for at least one day at 4°C and total RNA  
134 was extracted with RNeasy Plus Mini Kit (Qiagen) according to the manufacturer's  
135 instructions. Quality of total RNA was validated for RNA Integrity Number > 8.5 using an  
136 Agilent 2100 Bioanalyzer with the Agilent RNA 6000 Nano Kit (Agilent Technologies) and  
137 RNA quantity was evaluated using a NanoDrop ND-1000 spectrophotometer (Thermo Fisher  
138 Scientific). RT was performed from 400 ng of total RNA by using PrimeScript II 1st strand  
139 cDNA synthesis kit (Takara Bio Inc., Kusatsu, Japan) with combination of oligo(dT) and  
140 random hexamer primers according to the manufacturer's instructions.

141

### 142 *SI.10. Quantitative polymerase chain reaction*

143 For quantitative polymerase chain reaction (qPCR), each amplification was performed twice  
144 with the 7300 Real Time PCR System (Applied BioSystems, Foster City, CA) using the Sybr  
145 qPCR SuperMix W/ROX (Invitrogen Life Technologies). The qPCR conditions were as  
146 follows: 95°C for 10 min, followed by 40 cycles of denaturation at 95°C for 15 s and  
147 annealing at 60°C for 1 min. The steady-state mRNA levels of each gene were determined  
148 using *YWHAZ* expression for normalization, according to the  $2^{(-\Delta\Delta C_t)}$  calculation method  
149 [R6]. Sequences of primers used in this study are presented in Table S2. For some genes,

150 primer pairs were newly designed with Primer3 software (<http://primer3.ut.ee/>). All primer  
151 pair specificities were verified by *in silico* nBLAST analysis, and by loading on 2.5% agarose  
152 gel and Sanger-sequencing amplicons. Moreover, qPCR primer efficiencies were checked on  
153 RHE cDNA serial dilutions (1/10, 1/20, 1/40, 1/80, 1/160 and 1/320).

154

#### 155 *SI.11. Analysis of the expression of histidase at the mRNA level*

156 The mRNAs encoding histidase variants 2 (*HAL-V2*) and 3 (*HAL-V3*) were analyzed by RT-  
157 qPCR using specific primers (Table S2), whereas the variant 1 (*HAL-V1*) was analyzed by a  
158 classical PCR approach. PCR was performed by using the EconoTaq PLUS GREEN 2X PCR  
159 Master Mix (Lucigen, Middleton, WI). The PCR conditions were as follows: 95°C for 4 min,  
160 followed by 25 cycles of denaturation at 94°C for 30 s, annealing at 62°C for 30 sec, and  
161 elongation at 72°C for 1 min, followed by a final elongation at 72°C for 5 min.

162

163 **S2. Supplementary tables**

164

165 **Table S1.** Primary antibodies

| <b>Antigen</b>                   | <b>Antibody</b>                      | <b>Source (Reference)</b>              | <b>Dilution<br/>WB</b> | <b>IIF</b> |
|----------------------------------|--------------------------------------|----------------------------------------|------------------------|------------|
| Actin                            | clone C4                             | Merck Millipore,<br>Billerica, MA      | 1:10000                | -          |
| Bleomycin hydrolase              | polyclonal<br>HPA039548              | Sigma-Aldrich, St Louis,<br>MO         | 1:1000                 | -          |
| Calpain 1                        | polyclonal<br>HPA005992              | Sigma-Aldrich                          | 1:1000                 | -          |
| Caspase 14                       | clone D-10                           | Santa Cruz Biotech.,<br>Santa Cruz, CA | 1:100                  | -          |
| Corneodesmosin                   | clone G36-19                         | [R7]                                   | 1:1000                 | -          |
| Elastase 2                       | polyclonal K-14                      | Santa Cruz Biotech.                    | 1:200                  | -          |
| Filaggrin                        | clone AHF3                           | [R8]                                   | 1:1000                 | 1:1000     |
| Histidase                        | clone 4F2                            | Abnova, Taipei, Taiwan                 | 1:1000                 | -          |
| Involucrin                       | clone SY5                            | Sigma-Aldrich                          | 1:1000                 | -          |
| Kallikrein 5                     | polyclonal AF1108                    | R&D Systems,<br>Minneapolis, MN        | 1:500                  | -          |
| Keratin 10                       | polyclonal PRB-159P                  | Covance, Princeton, NJ                 | 1:40000                | -          |
| Keratin 14                       | polyclonal<br>HPA023040              | Sigma-Aldrich                          | 1:40000                | -          |
| Ki-67                            | clone SP6                            | Abcam, Cambridge,<br>United Kingdom    | -                      | 1:100      |
| Loricrin                         | polyclonal AF62                      | Covance                                | 1:10000                | -          |
| Matriptase                       | clone D-7                            | Santa Cruz Biotech.                    | 1:100                  | -          |
| Modified deiminated<br>proteins  | Anti-Modified<br>Citulline (AMC)*    | [R9]                                   | 1:2500                 | 1:1000     |
| Peptidyl-arginine<br>deiminase 1 | polyclonal anti-peptide<br>anti-PAD1 | [R10,R11]                              | 1:200                  | -          |
| Peptidyl-arginine<br>deiminase 3 | polyclonal anti-peptide<br>anti-PAD3 | Abcam, Cambridge                       | 1:200                  | -          |
| SASPase                          | polyclonal C-13                      | Santa Cruz Biotech.                    | 1:200                  | -          |
| Transglutaminase 1               | polyclonal A018                      | Zedira, Darmstadt,<br>Germany          | 1:200                  | -          |
| Transglutaminase 3               | polyclonal A015                      | Zedira                                 | 1:200                  | -          |
| Transglutaminase 5               | polyclonal A008                      | Zedira                                 | 1:500                  | -          |

166

167 \* When AMC antibodies were used, citrullyl residues were chemically modified before the  
168 saturation step by incubation at 37°C in 0.0125% FeCl<sub>3</sub>, 2.3M H<sub>2</sub>SO<sub>4</sub>, 1.5M H<sub>3</sub>PO<sub>4</sub>, 0.25%  
169 diacetyl monoxime and 0.125% antipyrine for 1 hour for western blot and 3 hours for indirect  
170 immunofluorescence, as previously described [R3,R9,R12].

171

172

173

174



175

176 **Table S2.** Sequences of PCR primers

| <b>Gene</b>   | <b>Forward primer</b>             | <b>Reverse primer</b>        | <b>Reference</b> |
|---------------|-----------------------------------|------------------------------|------------------|
| <i>ASPRV1</i> | GTTTCTCTTCTTGGCGTGGG              | ATGGTGCCAATGGTTGAGGT         | <i>this work</i> |
| <i>BLMH</i>   | GTGGTGGACAGGAAGCATGT              | TCCTTTGCAGCTACGTCAGG         | [R2]             |
| <i>CAPN1</i>  | CAAACACCCCTCCCCAGGATGT            | CGCACCCGCAGCTGCTCATA         | [R2]             |
| <i>CASP14</i> | TGCACGTTTATCCACGGTA               | TGCTTTGGATTCAGGGTTC          | [R2]             |
| <i>CDSN</i>   | ACTGCTGCTGGCTGGTCT                | AGAGCTTCTGGCACTGGAAA         | <i>this work</i> |
| <i>FLG</i>    | GCAAGGTCAAGTCCAGGAGAA             | CCCTCGGTTTCCACTGTCTC         | [R12]            |
| <i>IVL</i>    | GCCAGGTCCAAGACATTCAAC             | GGGTGGTTATTTATGTTTGGGTGG     | [R12]            |
| <i>KLK5</i>   | AGTCAGAAAAGGTGCGAGGA              | TGAAC TTGCAGAGGTTTCGTG       | <i>this work</i> |
| <i>KRT10</i>  | TGATGTGAATGTGGAAATGAATGC          | GTAGTCAGTTCCTTGCTCTTTTCA     | [R12]            |
| <i>KRT14</i>  | CTCATCCTCCCGCTTCTCCT              | AAAGCCACTACCAAAGCTGCT        | [R2]             |
| <i>LOR</i>    | CGAAGGAGTTGGAGGTGTTT              | ACTGGGGTTGGGAGGTAGTT         | [R13]            |
| <i>PADI1</i>  | AGAGTGACATCGTGGACATTC             | GCTCGTGGTAGGACAAGTAGTC       | [R12]            |
| <i>PADI2</i>  | GGTGGGATGAGCAGCAAGCGAATC          | GAACAGAGCGGGCAGGTCAATGATG    | [R12]            |
| <i>PADI3</i>  | GCAGAGTGTGACATCATTGACATCC         | GACCGCACCTTCTCCTCCAG         | [R12]            |
| <i>PADI4</i>  | CCACACGGGGCAAACCTGTC              | CAGCAGGGAGATGGTGAGGG         | [R12]            |
| <i>PADI6</i>  | CGTGGAGAAGTGCATTACCTGAAC          | GCCTCGCAAAGGACCTCTTGGG       | [R12]            |
| <i>ST14</i>   | ATCGCCTACTACTGGTCTGA              | GTTTTGGAGTCCGTGGGGAAA        | <i>this work</i> |
| <i>TGM1</i>   | CCCCCGCAATGAGATCTACA              | ATCCTCATGGTCCACGTACACA       | <i>this work</i> |
| <i>TGM3</i>   | GGAAGGACTCTGCCACAATGTC            | TGTCTGACTTCAGGTACTTCTCATACTG | <i>this work</i> |
| <i>TGM5</i>   | CGGAGCAGGTTGAGGACTGT              | GAGGACTCCAAGGAAGACTTTCTG     | <i>this work</i> |
| <i>HAL-V1</i> | AAAGAGAAAACAGTTGTTTACGGTAT<br>TAC | GCGATCTTTTATCCAGGGCCTTAC     | <i>this work</i> |
| <i>HAL-V2</i> | AGAGAAAACAGGGAGCTTCAGG            | CAAGATGAGAGAGTGGGGCA         | <i>this work</i> |
| <i>HAL-V3</i> | GTTGACTCCCTCTCCACCAG              | TACTTCCCAAACCTTACAACAGA      | <i>this work</i> |
| <i>YWHAZ</i>  | ACTTTTGGTACATTGTGGCTTCAA          | CCGCCAGGACAAACCAGTAT         | [R12]            |

177

178

179

180

181

### 182 **S3. Supplementary references**

- 183 [R1] A. Frankart, A. Coquette, K.-R. Schroeder, Y. Poumay, Studies of cell signaling in a  
184 reconstructed human epidermis exposed to sensitizers: IL-8 synthesis and release  
185 depend on EGFR activation, *Arch. Dermatol. Res.* 304 (2012) 289–303.
- 186 [R2] V. Pendaries, J. Malaisse, L. Pellerin, M. Le Lamer, R. Nachat, S. Kezic, A.-M. Schmitt,  
187 C. Paul, Y. Poumay, G. Serre, M. Simon, Knockdown of Filaggrin in a Three-  
188 Dimensional Reconstructed Human Epidermis Impairs Keratinocyte Differentiation, *J.*  
189 *Invest. Dermatol.* 134 (2014) 2938–2946.
- 190 [R3] M.-C. Méchin, L. Cau, M.-F. Galliano, S. Daunes-Marion, S. Poigny, J.-L. Vidaluc, S.  
191 Bessou-Touya, H. Takahara, G. Serre, H. Duplan, M. Simon, Acefylline activates  
192 filaggrin deimination by peptidylarginine deiminases in the upper epidermis, *J.*  
193 *Dermatol. Sci.* 81 (2016) 101–106.
- 194 [R4] M. Raghunath, H.C. Hennies, F. Velten, V. Wiebe, P.M. Steinert, A. Reis, H. Traupe, A novel in  
195 situ method for the detection of deficient transglutaminase activity in the skin, *Arch.*  
196 *Dermatol. Res.* 290 (1998) 621–627.
- 197 [R5] E.A. Leclerc, A. Huchenq, S. Kezic, G. Serre, N. Jonca, Mice deficient for the epidermal  
198 dermokine  $\beta$  and  $\gamma$  isoforms display transient cornification defects, *J. Cell Sci.* 127 (2014)  
199 2862–2872.
- 200 [R6] T. Senshu, K. Akiyama, S. Kan, H. Asaga, A. Ishigami, M. Manabe, Detection of  
201 Deiminated Proteins in Rat Skin: Probing with a Monospecific Antibody After  
202 Modification of Citrulline Residues, *J. Invest. Dermatol.* 105 (1995) 163–169.
- 203 [R7] G. Serre, V. Mils, M. Haftek, C. Vincent, F. Croute, A. Réano, J.P. Ouhayoun, S.  
204 Bettinger, J.-P. Soleilhavoup, Identification of late differentiation antigens of human

205 cornified epithelia, expressed in re-organized desmosomes and bound to cross-linked  
206 envelope, *J. Invest. Dermatol.* 97 (1991) 1061–1072.

207 [R8] M. Simon, M. Sebbag, M. Haftek, C. Vincent, E. Girbal-Neuhauser, J. Rakotoarivony,  
208 G. Sommé, D. Schmitt, G. Serre, Monoclonal Antibodies to Human Epidermal  
209 Filaggrin, Some Not Recognizing Profilaggrin, *J. Invest. Dermatol.* 105 (1995) 432-  
210 437.

211 [R9] T.D. Schmittgen, K.J. Livak, Analyzing real-time PCR data by the comparative CT  
212 method, *Nat. Protoc.* 3 (2008) 1101–1108.

213 [R10] M. Guerrin, A. Ishigami, M.-C. Méchin, R. Nachat, S. Valmary, M. Sebbag, M. Simon,  
214 T. Senshu, G. Serre, cDNA cloning, gene organization and expression analysis of  
215 human peptidylarginine deiminase type I, *Biochem. J.* 370(Pt 1) (2003) 167–174.

216 [R11] R. Nachat, M.-C. Méchin, H. Takahara, S. Chavanas, M. Charveron, G. Serre, M.  
217 Simon, Peptidylarginine Deiminase Isoforms 1–3 Are Expressed in the Epidermis and  
218 Involved in the Deimination of K1 and Filaggrin, *J. Invest. Dermatol.* 124 (2005) 384–  
219 393.

220 [R12] M.-C. Méchin, F. Coudane, V. Adoue, J. Arnaud, H. Duplan, M. Charveron, A.-M.  
221 Schmitt, H. Takahara, G. Serre, M. Simon, Deimination is regulated at multiple levels  
222 including auto-deimination of peptidylarginine deiminases, *Cell. Mol. Life Sci.* 67  
223 (2010) 1491–1503.

224 [R13] M. Visser, D. Zubakov, KN. Ballantyne, M. Kayser, mRNA-based skin identification  
225 for forensic applications, *Int. J. Legal Med.* 125 (2011) 253–263.

226

227 **S4. Supplementary figure legends**

228

229

230 **Fig. S1. Unchanged cell viability, outside-in permeability and proliferation in RHEs**  
231 **when exposed to the dry condition.** RHEs produced with keratinocytes from 3 different  
232 donors (B1-B3) and exposed to humid or dry conditions were collected at day 10. **(a)** Cell  
233 viability was measured with an MTT assay. Positive control corresponds to RHEs topically  
234 treated with 3% SDS. **(b)** Outside-in permeability was evaluated using the Lucifer Yellow  
235 assay. A Lucifer yellow solution was applied to RHEs and, after 6 hours of incubation, the  
236 dye concentration in the culture medium was measured. Positive control corresponds to  
237 immature RHEs (harvested at day 2). **(c)** Left part: representative immunodetection of Ki67  
238 on sections of fixed RHEs (3 different donors). Scale bar = 50  $\mu$ m. Right part: quantification  
239 of Ki67 positive nuclei per mm of epidermis length. *n. s.* = *no significant difference*.

240

241 **Fig. S2. Exposure to the dry condition alters the RHE ultrastructure.** RHEs produced  
242 with keratinocytes from 3 different donors (B1-B3) and exposed to humid or dry conditions  
243 were collected at day 10. **(a)** Quantification of cornified, granular and total viable keratinocyte  
244 layers. *n. s.* = *no significant difference*. **(b)** Transmission electron micrographs of the granular  
245 layers. Scale bar = 2  $\mu$ m. *SC*: *stratum corneum*; G1: first granular layer; G2: second granular  
246 layer; G3: third granular layer. Note the increased number of granular layers and the increased  
247 size of keratohyalin granules in RHEs cultivated in the dry condition *versus* the humid one.  
248 **(c)** Measurement of the keratohyalin granules (KHG) density (area of KHG / area of  
249 cytoplasm) and size.

250

251 **Fig. S3. Gene expression analyzed by RT-qPCR.** Expression of genes encoding (a) for  
252 keratin K14 and various differentiation markers, (b) for filaggrin (FLG) and (c) for proteases  
253 implicated in filaggrin breakdown was analyzed by RT-qPCR in RHEs exposed to humid (H)  
254 or dry (D) conditions (4 keratinocyte donors). *n. s. = no significant difference*

255

256 **Fig.S4. Imuunodetection of profilaggrin and filaggrin in dry RHEs.** RHEs were produced  
257 with keratinocytes from 3 different donors (B1-B3) in humid or dry conditions. Fixed-tissue  
258 sections were analyzed by indirect immunofluorescence with AHF3 to detect profilaggrin and  
259 filaggrin. Differential contrast images images are superimposed. Nuclei are stained in blue  
260 using DAPI, scale bar = 20 µm, the *stratum corneum* (SC) and *stratum granulosum* (SG) are  
261 indicated.

262

263 **Fig. S5. Expression of proteases proposed to be involved in filaggrin metabolism**  
264 **regulation.** (a) Expression of genes encoding kallikrein 5 (*KLK5*), matriptase (*ST14*) and  
265 skin-aspartic protease (SASPase; *ASPRV1*) was analyzed by RT-qPCR in RHEs exposed to  
266 humid or dry conditions (4 different donors). *n. s. = no significant difference*. Note: we did  
267 not succeed in detecting *elastase 2* transcripts. (b) Expression of actin (as a loading control),  
268 *KLK5*, *SASPase*, *matriptase* and *elastase 2* was analyzed by western blotting of total protein  
269 extracts prepared from RHEs produced with keratinocytes from 3 different donors (B1-B3)  
270 and exposed to humid (H) or dry (D) conditions.

271

272 **Fig. S6. Expression of histidase in RHEs.** Three variants of histidase (GenBank<sup>TM</sup> accession  
273 numbers: NM\_002108.3, NM\_001258333.1 and NM\_001258334.1) were detected in RHEs  
274 by both RT-qPCR and western blotting. (a) Expression of the variant 1 encoding mRNAs  
275 (*HAL-VI*) analyzed by RT-PCR in RHEs exposed to humid (H) or dry (D) conditions (4

276 keratinocyte donors). **(b)** Expression of variants 2 and 3 encoding mRNAs (*HAL-V2* and  
277 *HAL-V3*) analyzed by RT-qPCR in RHEs exposed to humid or dry conditions (4 different  
278 donors). *n. s.* = *no significant difference*. **(c)** Detection of the three variants of histidase by  
279 western blotting of TE-NP40 extracts prepared from RHEs produced with keratinocytes from  
280 3 different donors (B1-B3) and exposed to humid (H) or dry (D) conditions.
