# Supplementary material
Source: PubMed Central journal article supplement (PMC5476296)

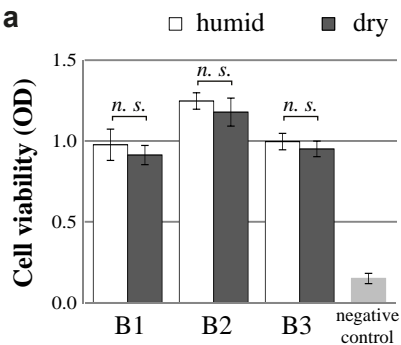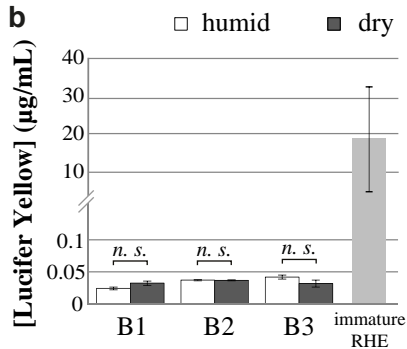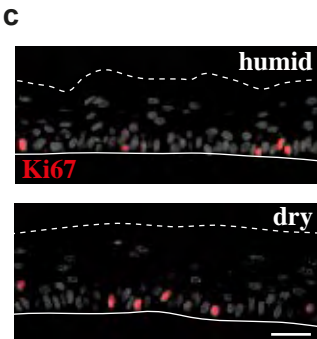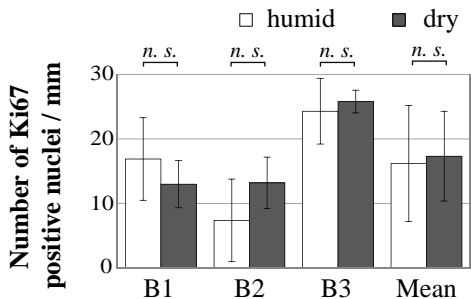

Figure S1

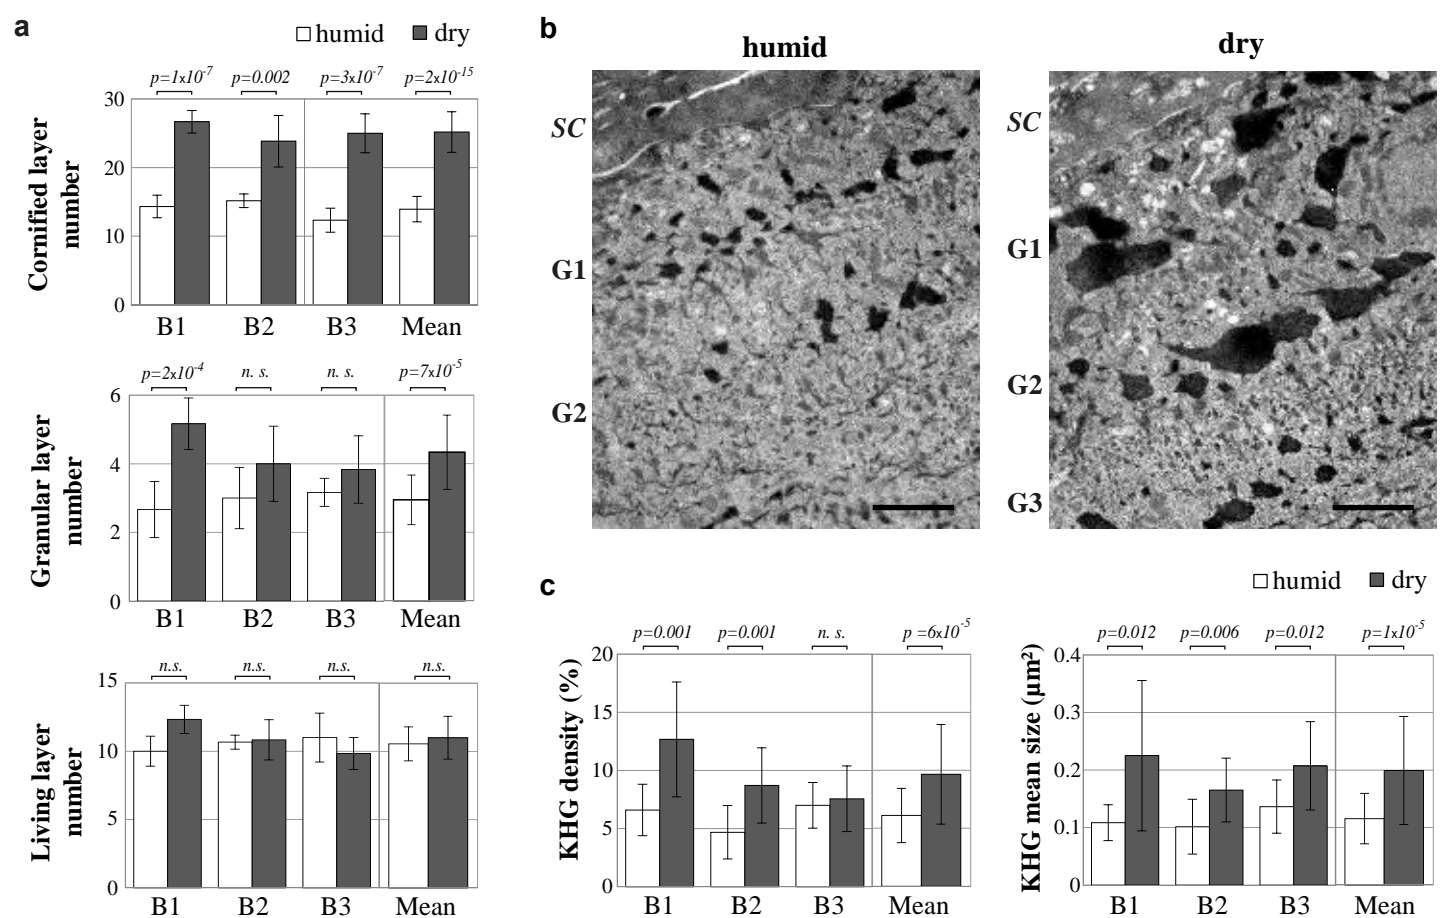

Figure S2

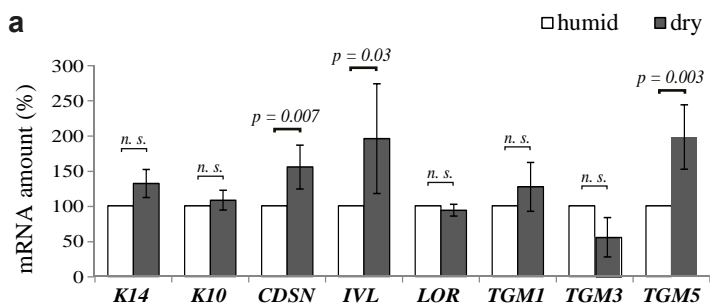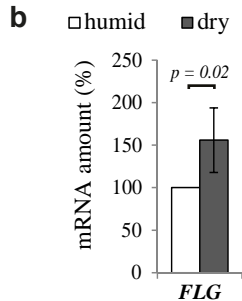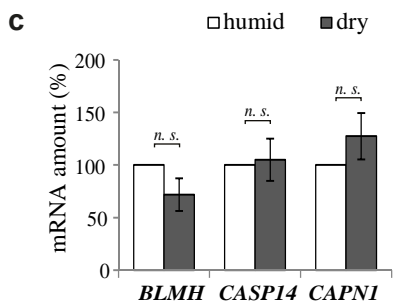

**Figure S3**

**B1****humid**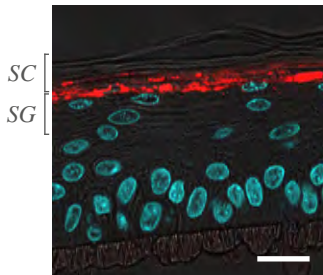**dry**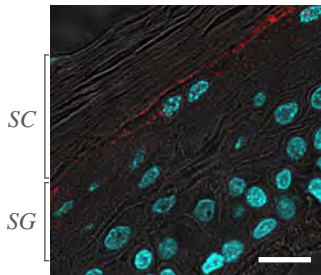**B2****humid**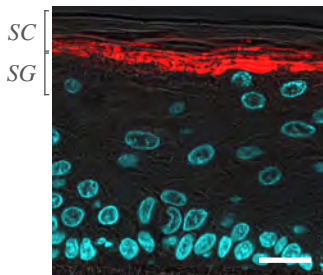**dry**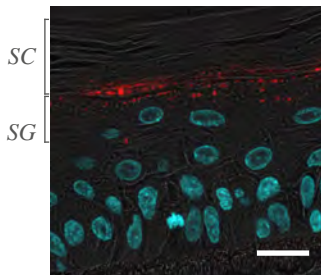**B3****humid**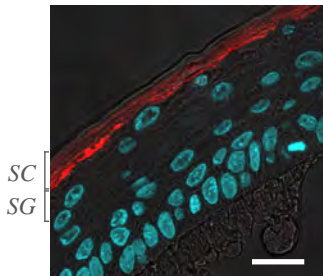**dry**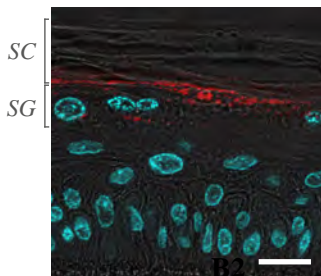**Figure S4**

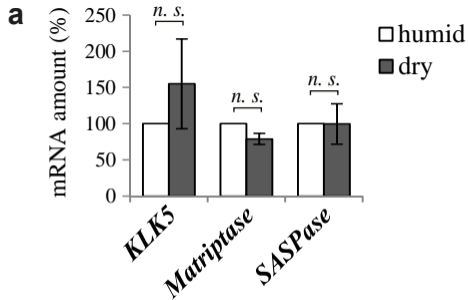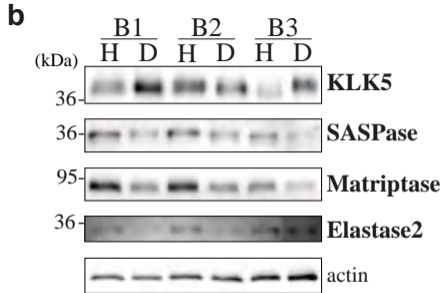

**Figure S5**

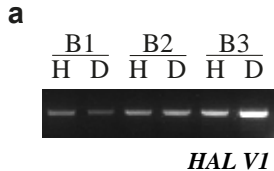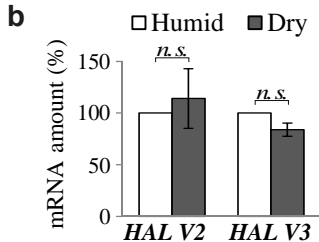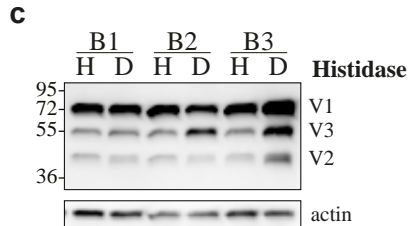

**Figure S6**

Supplement: NIHMS864281-supplement-FIG_S1-S6.pdf [file NIHMS864281-supplement-FIG_S1-S6.pdf]
